# Supplementary material
Source: PubMed Central journal article supplement (PMC6372130)
Supplement: supp_dyv137_dyv137-suppl_data.pdf [file supp_dyv137_dyv137-suppl_data.pdf]

## APPENDIX 1 – Implementation of percentile bootstrap confidence intervals

The SAS, Stata, and R code shown below can be used to obtain percentile bootstrap confidence intervals for the standardized estimates calculated in [Figure 1](#). The code below uses 2 000 samples, but this can be changed by the user.

### SAS CODE

```
* Set up bootstrap resampling;
data boot;
  do sample=1 to 2000;
    do i=1 to nobs;
      pt=round(ranuni(12)*nobs);
      set one nobs=nobs point=pt ;
      output;
      end;
  end;
stop; run;

proc logistic data = boot descending; by sample;
  model E = Z1 Z2;
  output out = boot predicted=ps;

proc logistic data = boot descending; by sample;
  model E = ;
  output out=boot predicted=marg_pr;

data boot;
  set boot;
  sw = E*marg_pr/ps + (1-E)*(1-marg_pr)/(1-ps); run;

* Obtain bootstrap confidence intervals for risk ratio ;

ods output Estimates=rr_est ;
proc genmod data = boot descending; by sample;
  model D = E / link=log dist=bin ;
  weight sw; estimate 'rr' E 1 / exp; run;
ods rtf close;

data rr;
set rr_est;
  if Label ne 'rr'; epred=LBetaEstimate; run;

proc univariate data=rr;
  var epred; output out=rr_cis pctlpts=2.5 97.5 pctlpre=rr_cis; run;

proc print data=rr_cis noobs label; run;

* Obtain bootstrap confidence intervals for risk difference ;

ods output Estimates=rd_est ;
proc genmod data = boot descending; by sample;
  model D = E / link=identity dist=bin ;
  weight sw; estimate 'rd' E 1 ; run;
ods rtf close;

data rd;
set rd_est;
  epred=LBetaEstimate; run;

proc univariate data=rd;
  var epred; output out=rd_cis pctlpts=2.5 97.5 pctlpre=rd_cis; run;

proc print data=rd_cis noobs label; run;
```

### STATA CODE

```
*For the RR
program margrr, rclass

*Calculate denominators used in inverse probability weights
logit E Z1 Z2
predict den

*Create stabilized weights, using a null model with E as the dependent variable
logit E
predict num
g sw=E*num/den+(1-E)*(1-num)/(1-den)

*Fit a log binomial model to the weighted data for the E-D association, with robust
variance
glm D E [pw=sw],family(binomial) link(log) robust
matrix b=e(b)
local b=el(b,1,1)
return scalar beta = `b'
drop num den sw
end

bootstrap b=r(beta): margrr
estat bootstrap, eform
```

```
*For the RD
program margrd, rclass

*Calculate denominators used in inverse probability weights
logit E Z1 Z2
predict den

*Create stabilized weights, using a null model with E as the dependent variable
logit E
predict num
g sw=E*num/den+(1-E)*(1-num)/(1-den)

*Fit a linear binomial model to the weighted data for the E-D association, with robust
variance
glm D E [pw=sw],family(binomial) link(id) robust
matrix b=e(b)
local b=el(b,1,1)
return scalar beta = `b'
drop num den sw
end

bootstrap b=r(beta): margrd
estat bootstrap,
```

### R CODE

```
# If 'boot' package not installed, enter in console: install.packages('boot')
library(boot)

# Specify starting value for random number generation for re-sampling
set.seed(12)

# For the risk ratio, create wrapper function for bootstrap procedure...
# in which the propensity score is re-estimated in each re-sampling
sptw.wrap=function(dat,indices)
{
  dat=dat[indices,]
  E.out=glm(E~Z1+Z2,family=binomial(link="logit"),data=dat,na.action=na.exclude)
  ps=predict(E.out,type="response")
  new.sptw=dat$E*mean(dat$E)/ps+(1-dat$E)*(1-mean(dat$E))/(1-ps)
  coef(glm(D~E,family=binomial(link="log"),weight=new.sptw,data=dat))[2]
}

# Invoke wrapper function to perform bootstrap using the dataset of interest for
2000 samples
boot.out=boot(one,sptw.wrap,2000)
boot.out

# Display percentile bootstrap point and 95% confidence interval estimates
median(boot.out$t)
boot.ci(boot.out,type="perc",conf=0.95)

# plot density of bootstrap resamples
plot(density(boot.out$t))

# For the risk difference, create wrapper function for bootstrap procedure...
# in which the propensity score is re-estimated in each re-sampling
sptw.wrap=function(dat,indices)
{
  dat=dat[indices,]

  E.out=glm(E~Z1+Z2,family=binomial(link="logit"),data=dat,na.action=na.exclude)
  ps=predict(E.out,type="response")
  new.sptw=dat$E*mean(dat$E)/ps+(1-dat$E)*(1-mean(dat$E))/(1-ps)
  coef(glm(D~E,family=binomial(link="identity"),weight=new.sptw,data=dat))[2]
}

# Invoke wrapper function to perform bootstrap using the dataset of interest for
2000 samples
boot.out=boot(one,sptw.wrap,2000)
boot.out

# Display percentile bootstrap point and 95% confidence interval estimates
median(boot.out$t)
boot.ci(boot.out,type="perc",conf=0.95)

# plot density of bootstrap resamples
plot(density(boot.out$t))
```

---

## APPENDIX 2 – Implementation of standardized (weighted) estimates for two dichotomous exposure variables of interest

### SAS CODE

```
/* Calculate denominators for weights. Logistic regression model for SMK. */
proc logistic data = EVANS descending;
  model smk = age age*age age*age*age;
  output out = outpssmk predicted=ps; run;

/* Fit a second logistic regression model with CAT as the dependent variable. */
proc logistic data = EVANS descending;
  model cat = smk age age*age age*age*age chl chl*chl chl*chl*chl age*smk
  age*age*smk age*age*age*smk;
  output out = outpscatt predicted=pc; run;

/* Create one dataset with conditional probabilities for SMK (ps) and CAT (pc) for
each obs. */
proc sort data = outpssmk; by id; proc sort data = outpscatt; by id; run;

data margstruc;
merge outpssmk outpscatt; by id; run;

/* Create stabilized weights for SMK, first using a null model with SMK as dependent
variable. */
proc logistic data = margstruc descending;
  model smk = ; output out=iptw2 predicted =marg_pr_smk; run;

data iptw2; set iptw2;
  swsmk = smk*marg_pr_smk/ps + (1-smk)*(1-marg_pr_smk)/(1-ps); run;

/* Create stabilized weights for CAT first using a null model with CAT as the
dependent variable */
proc logistic data = iptw2 descending;
  model cat = ; output out=iptw2 predicted =marg_pr_cat; run;

data iptw2; set iptw2;
  swcat = cat*marg_pr_cat/pc + (1-cat)*(1-marg_pr_cat)/(1-pc); run;

/* Compute final regression weights. */
data iptw2; set iptw2;
  swfinal = swsmk*swcat; run;

/* Fit log binomial model for standardized risk ratios with robust variance. */
proc genmod data = iptw2 descending;
  class id;
  model chd = cat smk cat*smk / link=log dist=bin covb;
  weight swfinal;
  repeated subject=id / type=ind; run;

/* Fit linear binomial model for standardized risk differences with robust variance. */
proc genmod data = iptw2 descending;
  class id;
  model chd = cat smk cat*smk / link=identity dist=bin covb;
  weight swfinal;
  repeated subject=id / type=ind;
run;
```

### STATA CODE

```
* Calculate denominators for weights. Model for SMK
  logit smk age age*age age*age*age
  predict ps

* Second model for CAT
  logit cat smk age age*age age*age*age chl chl*chl chl*chl*chl age*smk
  age*age*smk age*age*age*smk
  predict pc

* Create stabilized weights, using a null model with SMK as the dependent variable
  logit smk
  predict marg_prsmk
  g swsmk=smk*marg_prsmk/ps+(1-smk)*(1-marg_prsmk)/(1-ps)

* Create stabilized weights, using a null model with CAT as the dependent variable
  logit cat
  predict marg_prcat
  g swcat=cat*marg_prcat/pc+(1-cat)*(1-marg_prcat)/(1-pc)

* Compute final regression weights
  g swfinal = swsmk*swcat

* Fit a log binomial model for standardized risk ratios with robust variance
  glm chd cat smk cat*smk [pw=swfinal],family(binomial) link(log) robust

* Fit a linear binomial model for standardized risk differences with robust variance
  glm chd cat smk cat*smk [pw=swfinal],family(binomial) link(id) robust
```

### R CODE

```
# variable definitions:
# age2 = age*age
# age3 = age*age*age
# chl2 = chl*chl
# chl3 = chl*chl*chl
# a1s = age*smk
# a2s = age*age*smk
# a3s = age*age*age*smk
# c1s = cat*smk

# Calculate denominators for weights. Logistic regression model for SMK
smk.out=glm(smk~age+age2+age3,family=binomial(link="logit"),data=evans,na
a.action=na.exclude)
ps=predict(smk.out,type="response")
summary(smk.out)

# Fit a second logistic regression model with CAT as the dependent variable
cat.out=glm(cat~smk+age+age2+age3+chl+chl2+chl3+a1s+a2s+a3s,family=binomial(link="logit"),data=evans,na.action=na.exclude)
pc=predict(cat.out,type="response")
summary(cat.out)

# Create stabilized weights for SMK, using the "mean" operator to create
numerators
swsmk=evans$smk*mean(evans$smk)/ps+(1-(evans$smk))*(1-
mean(evans$smk))/(1-ps)
summary(swsmk)

# Create stabilized weights for CAT, using the "mean" operator to create
numerators
swcat=evans$cat*mean(evans$cat)/pc+(1-(evans$cat))*(1-
mean(evans$cat))/(1-pc)
summary(swcat)

# Compute final regression weights
swfinal = swsmk*swcat
summary(swfinal)

# Fit log binomial model for standardized risk ratios with robust variance
library(geepack)
summary(geeglm(chd~cat+smk+c1s,family=binomial(link="log"),
weight=swfinal, id=id, data=evans))

# Fit linear binomial model for standardized risk differences with robust variance
library(geepack)
summary(geeglm(chd~cat+smk+c1s,family=binomial(link="identity"),
weight=swfinal, id=id, data=evans))
```
